# Supplementary material for: Social network interventions for health behaviours and outcomes: A systematic review and meta-analysis
Source: PLoS Med. 2019 Sep 3;16(9):e1002890. doi: 10.1371/journal.pmed.1002890 (PMC6719831; doi:10.1371/journal.pmed.1002890)
Supplement: S9 Fig — (DOCX) [file pmed.1002890.s019.docx]

**S9 Fig: Forest plot for subgroup analysis of sexual health outcomes reported at >six months to <12 months: intervention length (3 months or less; 3 months—6 months or less; 6 months—12 months or less; 12 months—18 months or less; greater than 18 months)**

| **Intervention length** |  | **Odds ratio (95% CI)** | **I-squared (%)** |
| --- | --- | --- | --- |
| 3 months or less | 1.77 (1.38, 2.28) | 0 |
| 3 months-6 months or less | 1.05 (0.70, 1.57) | 50 |
| 6 months-12 months or less | 1.64 (1.36, 1.97) | 0 |
| 12 months or longer |  | NA |
|  |  |  |
|  |  |  |
|  | Favours Intervention  Favours Control |  |  |
