# Supplementary material for: Social network interventions for health behaviours and outcomes: A systematic review and meta-analysis
Source: PLoS Med. 2019 Sep 3;16(9):e1002890. doi: 10.1371/journal.pmed.1002890 (PMC6719831; doi:10.1371/journal.pmed.1002890)
Supplement: S37 Fig — (DOCX) [file pmed.1002890.s047.docx]

**S37 Fig: Forest plot for sensitivity analysis of drug risk outcomes reported at last follow-up: Intention-to-treat**

| **Intention-to-treat** |  | **Odds ratio (95% CI)** | **I-squared (%)** |
| --- | --- | --- | --- |
| ITT analysis | 2.63 (1.25, 5.56) | NA |
| No ITT analysis/unclear | 1.29 (0.66, 2.53) | NA |
|  |  |  |
|  | Favours Intervention  Favours Control |  |  |
