# Supplementary material for: Social network interventions for health behaviours and outcomes: A systematic review and meta-analysis
Source: PLoS Med. 2019 Sep 3;16(9):e1002890. doi: 10.1371/journal.pmed.1002890 (PMC6719831; doi:10.1371/journal.pmed.1002890)
Supplement: S40 Fig — (DOCX) [file pmed.1002890.s050.docx]

**S40 Fig: Forest plot for sensitivity analysis of sexual health outcomes reported at last follow-up: attrition rate**

| **Attrition rate** | Favours Control  Favours Intervention | **Odds ratio (95% CI)** | **I-squared (%)** |
| --- | --- | --- | --- |
| Attrition rate less than 20% | 1.36 (1.19, 1.56) | NA |
| Attrition rate 20% or greater | 2.00 (0.66, 6.12) | 94 |
|  |  |  |
|  |  |  |  |
|  |  |  |  |
